# Supplementary material for: Chimeric antigen receptor T cells targeting PD-L1 suppress tumor growth
Source: PubMed Central journal article supplement (PMC7268496; doi:10.1186/s40364-020-00198-0), 2020-06-03

# Supplemental Figure 1

A

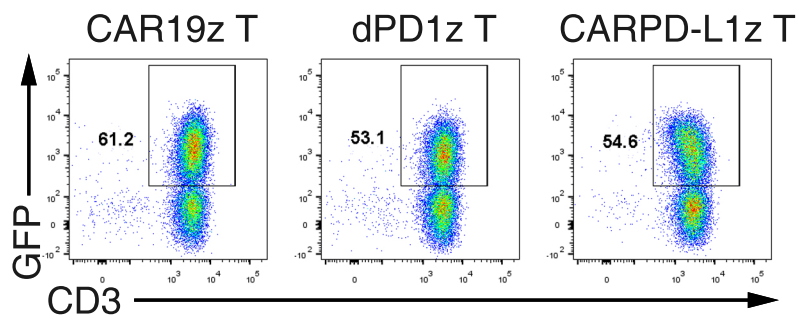

B

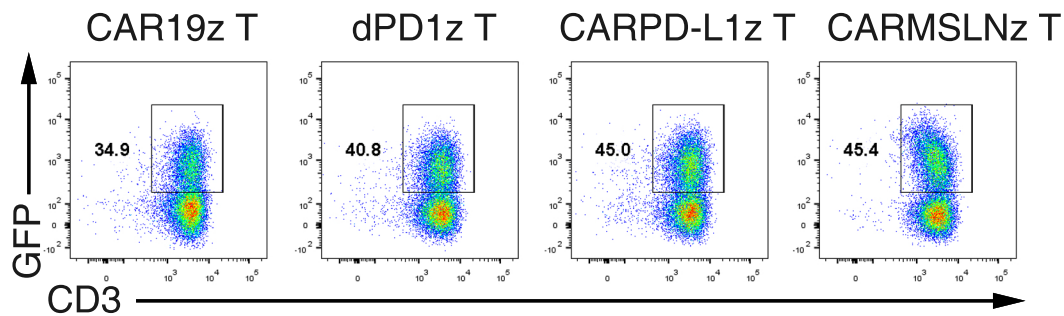

C

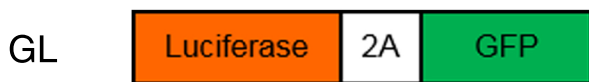

D

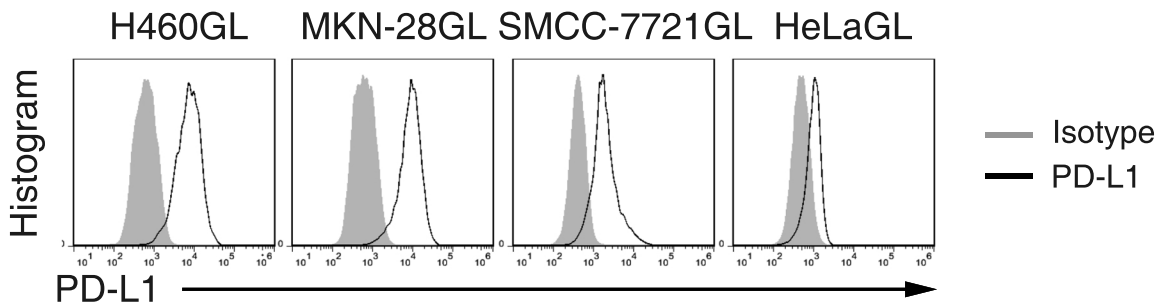

E

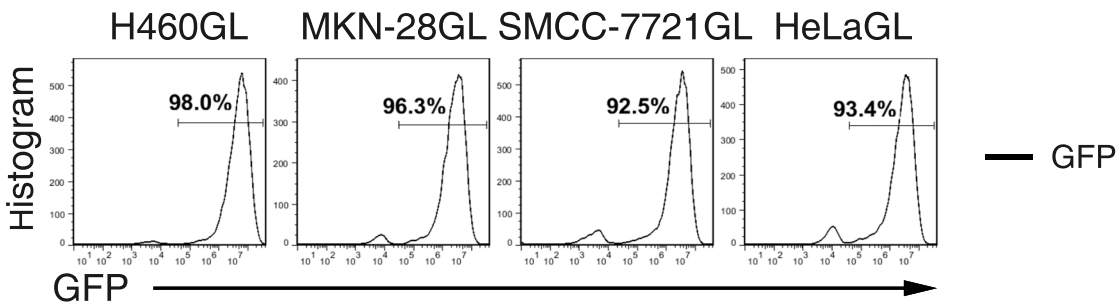

# Supplemental Figure 2

A

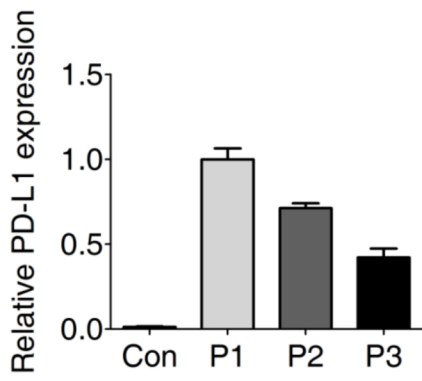

B

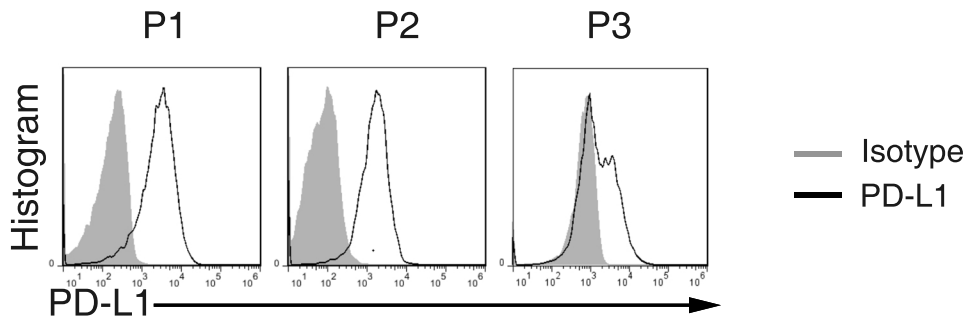

C

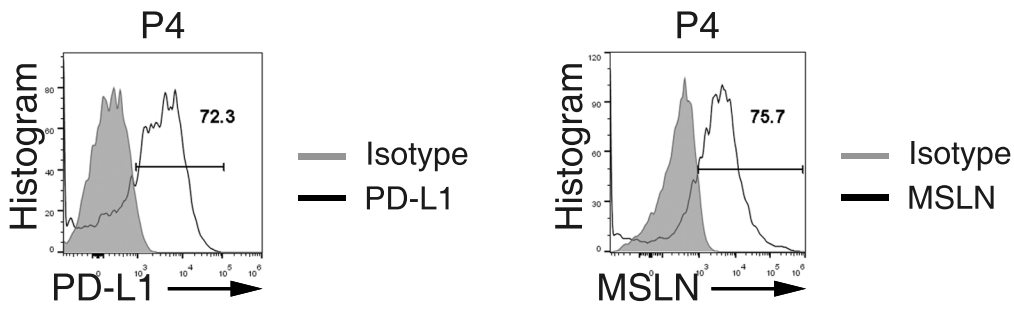

# Supplemental Figure 3

A

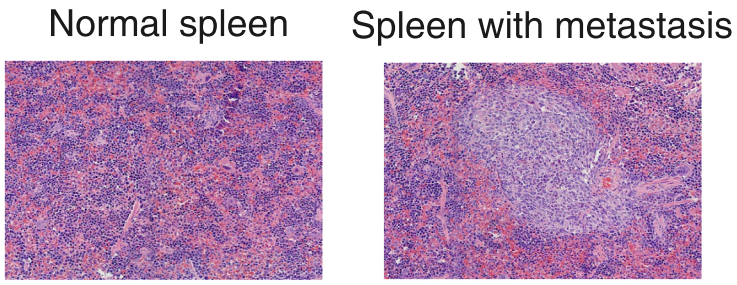

B

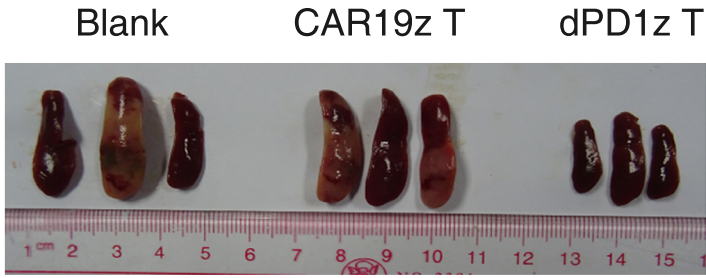

C

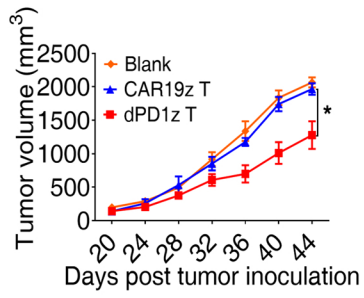

D

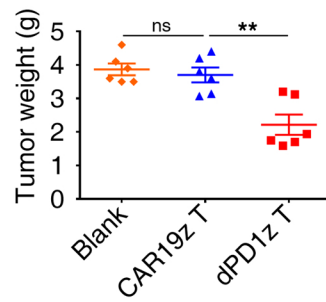

# Supplemental Figure 4

A

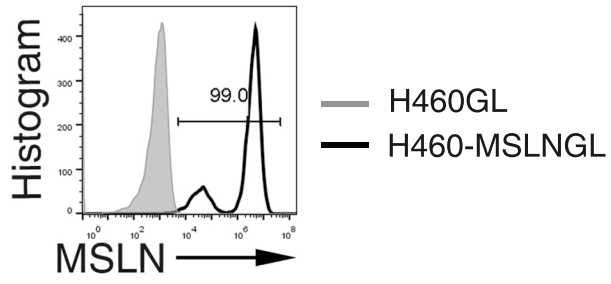

B

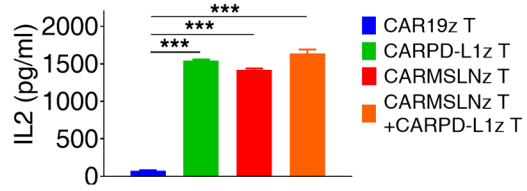

C

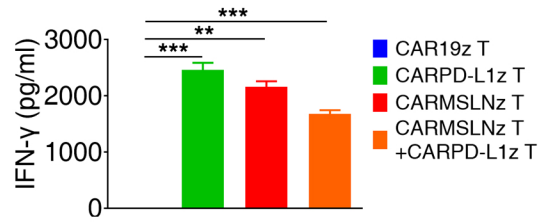

# Supplemental Figure 5

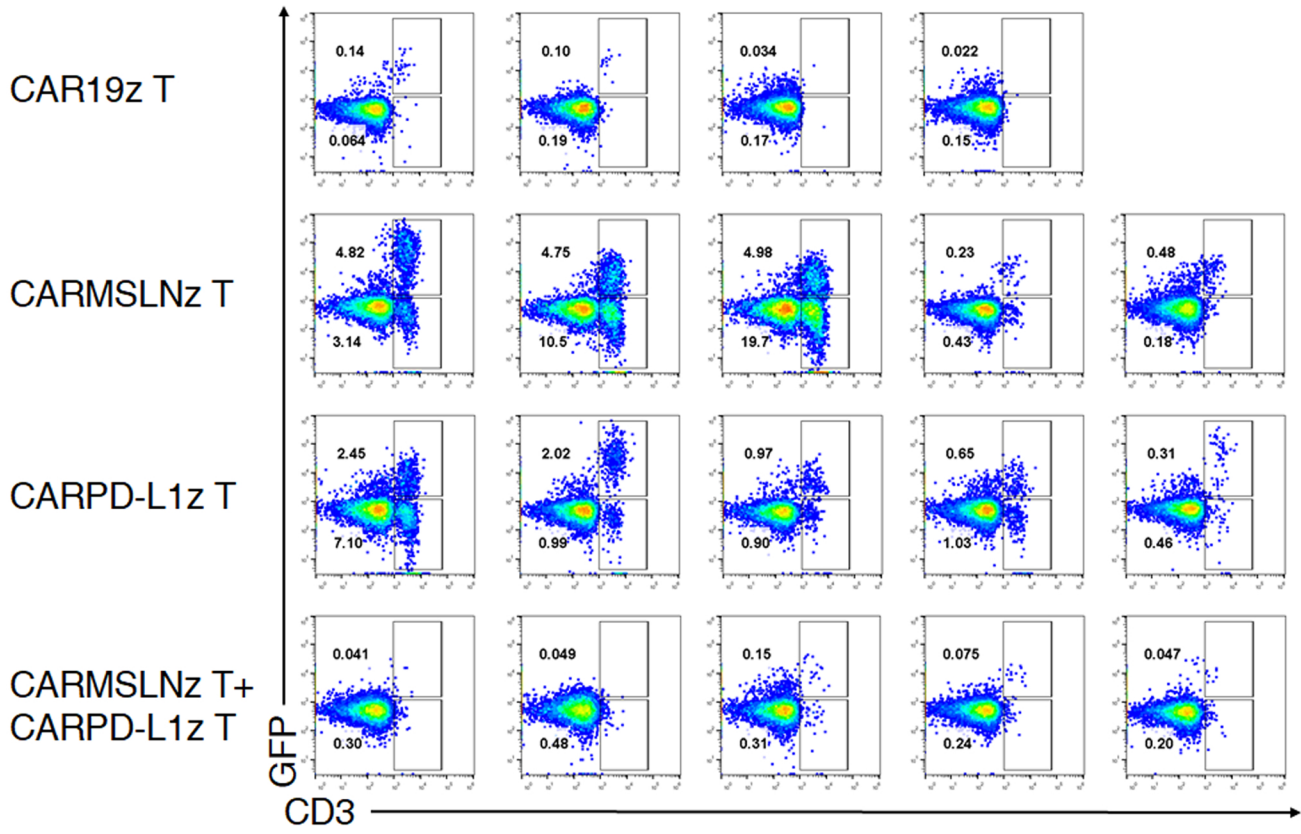

# Supplemental Figure 6

**A**

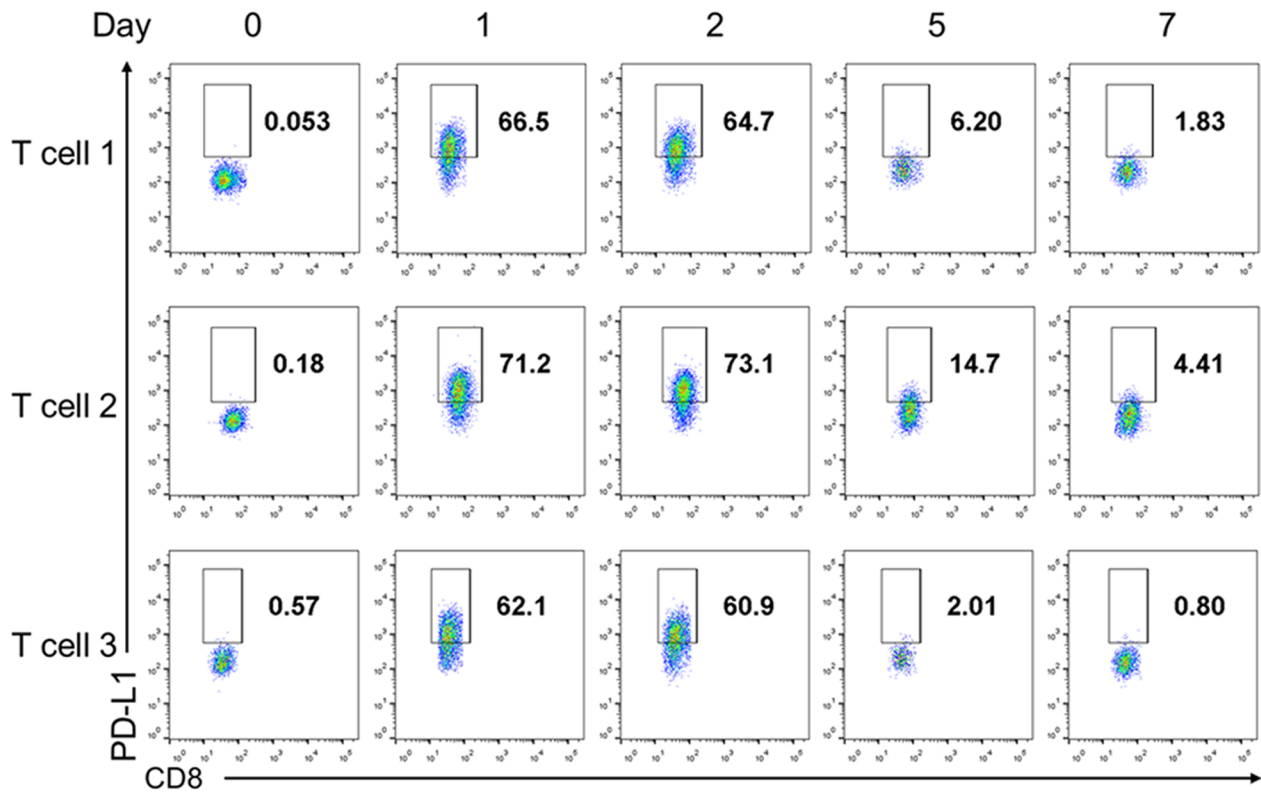

**B**

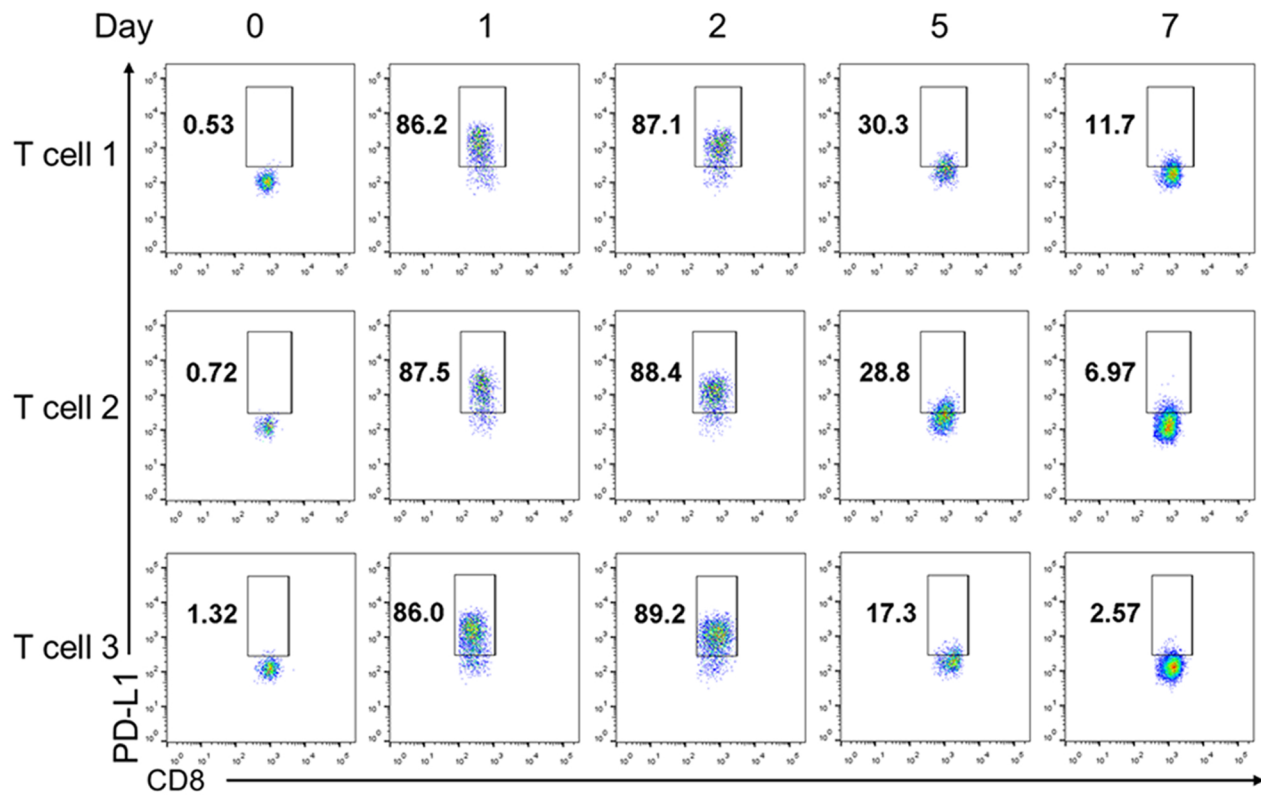

# Supplemental Figure 7

**A**

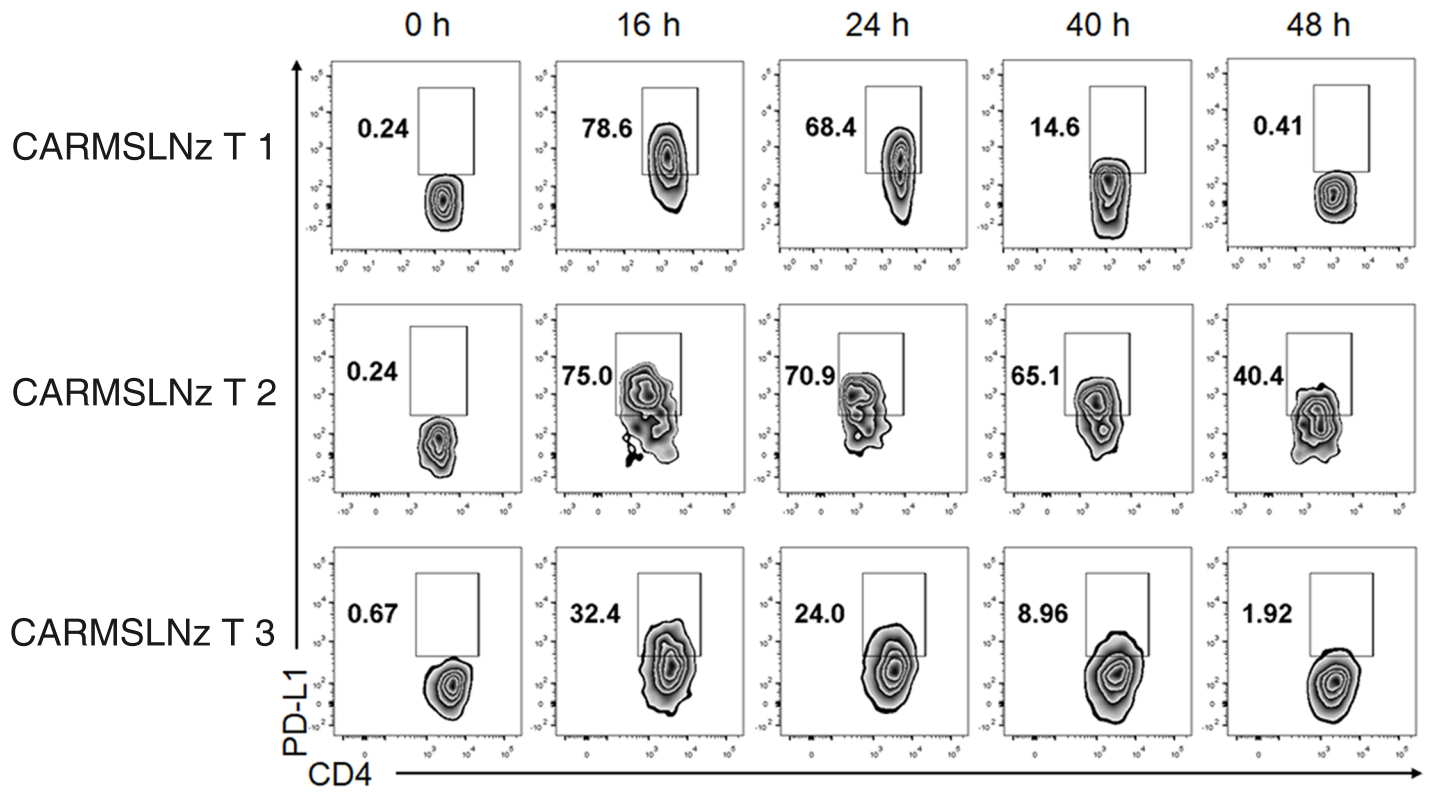

**B**

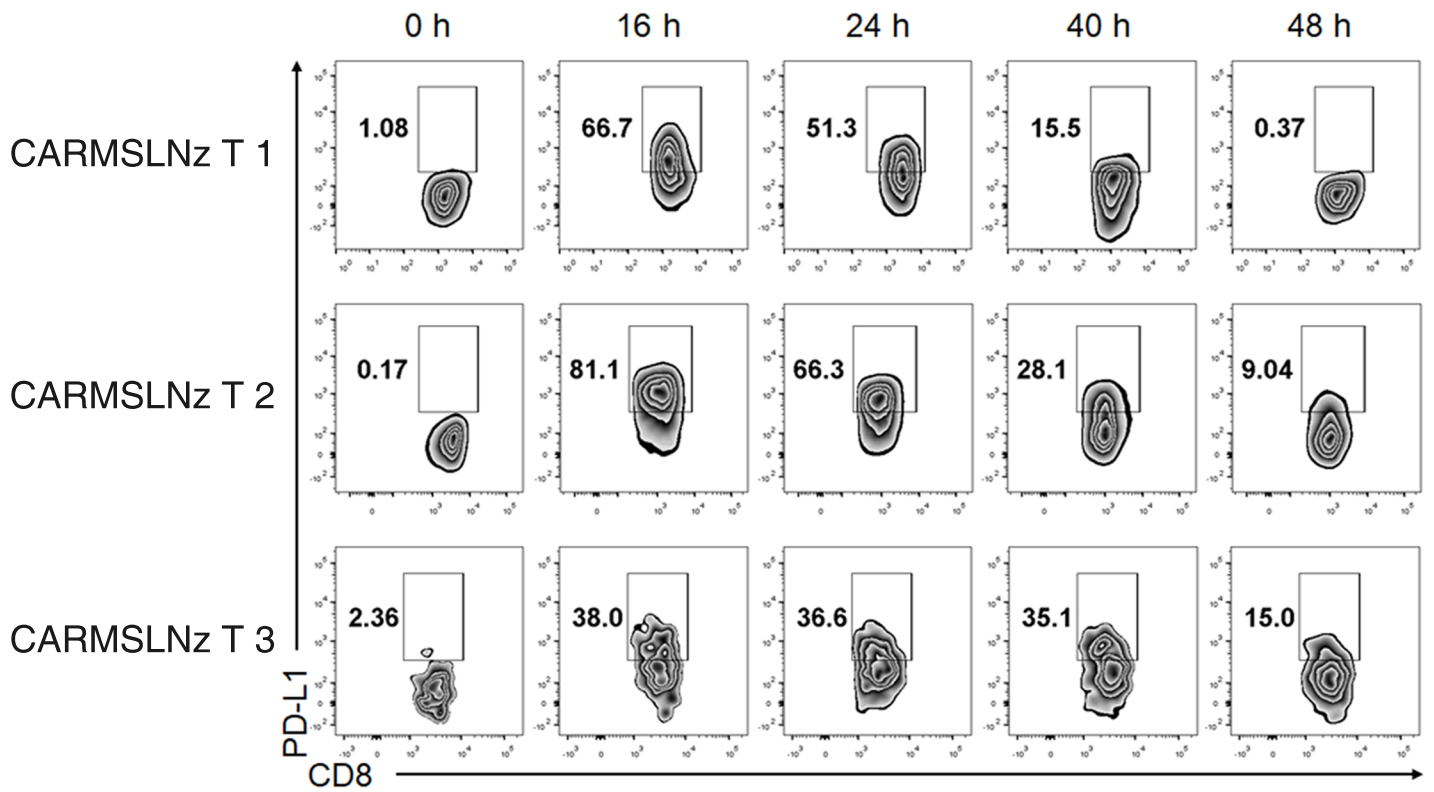

# Supplemental Figure 8

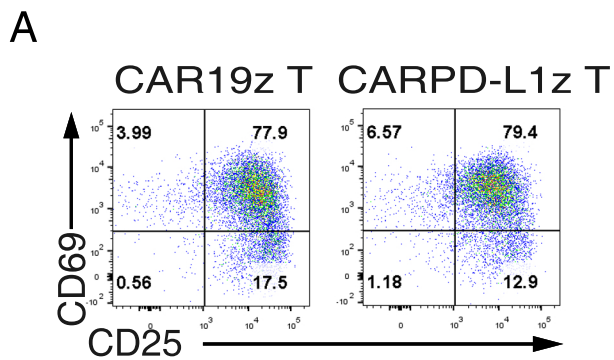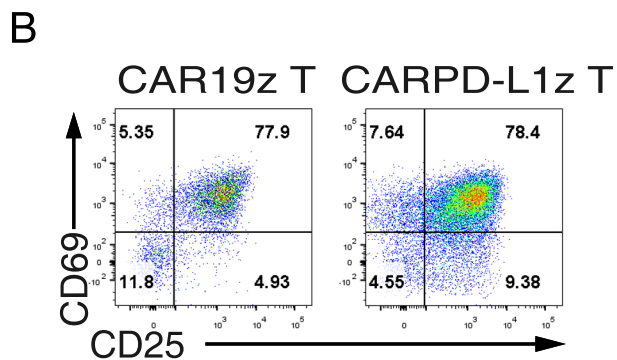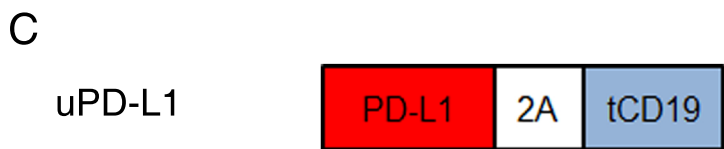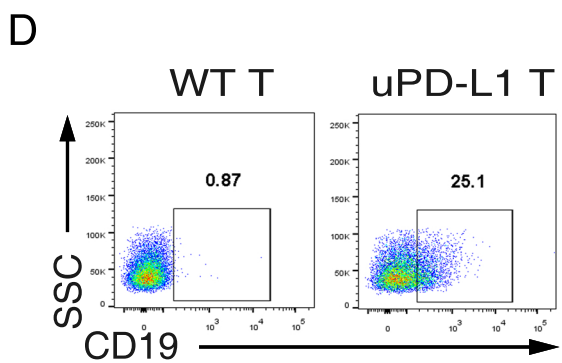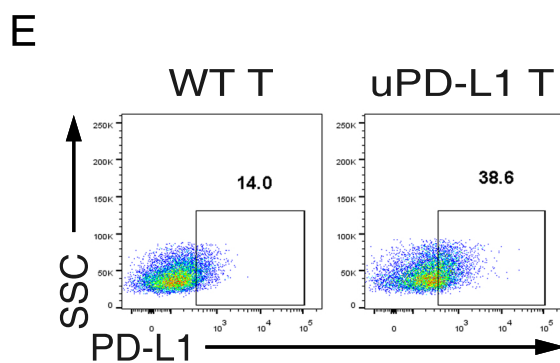

Supplement: 40364_2020_198_MOESM1_ESM.pdf [file 40364_2020_198_MOESM1_ESM.pdf]
